# Supplementary material
Source: ML conference proceedings conference paper supplement (https://www.ecva.net/papers/eccv_2020/papers_ECCV/html/123590392_ECCV_2020_paper.php)
Supplement: Supplementary file 1 [file 123590392-supp.pdf]

# Supplementary Material

## 1 Parameter settings

Table 1: Settings and hyperparameters for our experiments.

| <i>Settings or hyperparameters</i>     |                                        | <i>Value</i>                                       |
|----------------------------------------|----------------------------------------|----------------------------------------------------|
| Common settings                        | Pyramid level $L$                      | 3                                                  |
|                                        | Number of neighboring frames $N$       | 1                                                  |
|                                        | Number of sub-bands in (5) $n_w$       | 4                                                  |
|                                        | Stepsize of Adam optimizer             | $2.5 \times 10^{-4}$                               |
|                                        | Minibatch size                         | 32                                                 |
|                                        | Scaling parameter $\epsilon_m$ in (4)  | $10^{-3}$                                          |
|                                        | Scaling parameter $\epsilon_w$ in (5)  | $10^{-3}$                                          |
| Weight matrix $\mathbf{W}$ in (5)      | {0.1, 1, 1, 1}                         |                                                    |
| Training stage 1                       | Input size (H $\times$ W)              | $256 \times 256$                                   |
|                                        | Learning rate                          | $2 \times 10^{-4}$ (decay 2 per $10^5$ iterations) |
|                                        | Iteration number                       | $3 \times 10^5$                                    |
|                                        | Motion loss weight $\alpha$ in (3)     | 10 (decay 10 per $5 \times 10^4$ iterations)       |
| Adversarial loss weight $\beta$ in (3) | 0                                      |                                                    |
| Training stage 2                       | Input size (H $\times$ W)              | $128 \times 128$                                   |
|                                        | Learning rate                          | $10^{-4}$ (decay 2 per $10^5$ iterations)          |
|                                        | Iteration number                       | $6 \times 10^5$                                    |
|                                        | Motion loss weight $\alpha$ in (3)     | $10^{-2}$                                          |
|                                        | Adversarial loss weight $\beta$ in (3) | $5 \times 10^{-3}$                                 |

Due to the space limitation, we move the table of settings and hyperparameters for our experiments to our supplementary material. The settings and hyperparameters referred to in Section 5.1 are summarized in Table 1.

## 2 Details about the framework

Here, we further provide the details about the motion compensation and the wavelet reconstruction network applied in MW-GAN, as shown in Figure 1.

## 3 Visualization in Wavelet Domain

To further verify the ability of our MW-GAN in high-frequency recovery, we show the result of our MW-GAN in wavelet domain in Figure 2. As illustrated in Figure 2, our MW-GAN can effectively enrich the high-frequency sub-bands, thus obtaining high perceptual quality, while the state-of-the-art method [1]

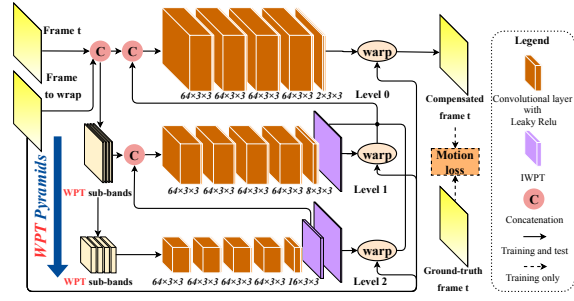

(a)

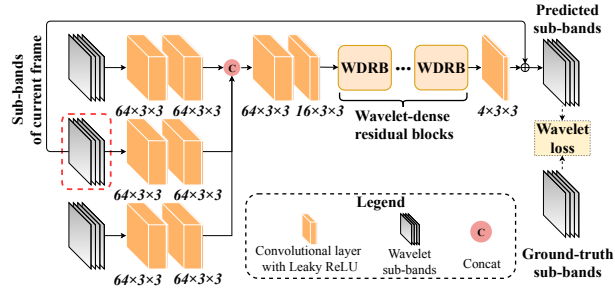

(b)

Fig. 1: Details about our framework. (a) Architecture of the motion compensation network in the generator; (b) Architecture of the wavelet reconstruction network in MW-GAN.

obtains low perceptual quality, due to the failure of enhancing high-frequency sub-bands. Similar results can be found for other state-of-the-art methods [9, 2, 8, 6].

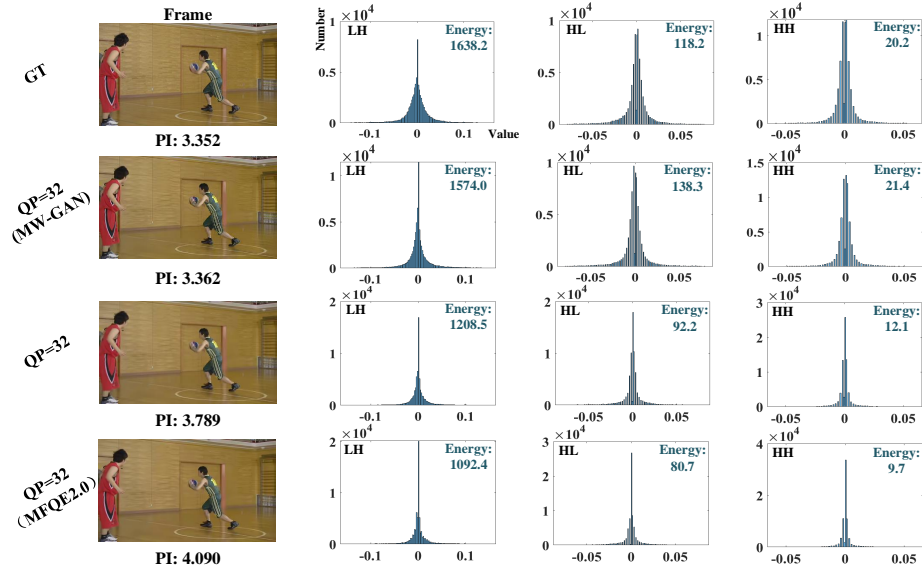

Fig. 2: Histograms of the wavelet sub-bands (zoom in for details). As can be seen, our MW-GAN can enrich the high-frequency sub-bands, thus obtaining high perceptual quality (low PI). However, the state-of-the-art method [1] obtains low perceptual quality, due to the failure of enhancing high-frequency sub-bands. Similar results can be found for other state-of-the-art methods [9, 2, 8, 6].

## 4 Additional Metric Evaluation

In this section, we further provide results of SSIM [7], Ma [3] and NIQE [4] referred to in our paper. Table 2 represents  $\Delta\text{PSNR}$  and  $\Delta\text{SSIM}$  between enhanced and compressed frames, where  $\Delta\text{PSNR} > 0$  and  $\Delta\text{SSIM} > 0$  indicate improvement in objective quality. Besides, Table 2 represents  $\Delta\text{Ma}$  and  $\Delta\text{NIQE}$  between enhanced and compressed frames, where  $\Delta\text{Ma} > 0$  and  $\Delta\text{NIQE} < 0$  indicate improvement in perceptual quality. As shown in these tables, although existing methods [2, 6, 8, 9, 1] have positive  $\Delta\text{PSNR}$  and  $\Delta\text{SSIM}$  values, all of them but MFQE2.0 [1] also gain negative  $\Delta\text{Ma}$  and positive  $\Delta\text{NIQE}$ . Besides, although MFQE2.0 [1] has positive  $\Delta\text{Ma}$ , it also reaches highest  $\Delta\text{NIQE}$ . Thus, all the methods above fail to enhance perceptual quality of compressed video.

Furthermore, our MW-GAN gains the largest increase of  $\Delta\text{Ma}$  and decrease of  $\Delta\text{NIQE}$  in both  $\text{QP} = 32$  and  $\text{QP} = 37$ , verifying the generalization ability of our MW-GAN for perceptual quality enhancement of compressed video.

Table 2: Overall  $\Delta\text{PSNR}$  (dB) and  $\Delta\text{SSIM}$  between enhanced and compressed frames on the test set of JCT-VC [5] at  $\text{QP} = 32$  and  $\text{QP} = 37$ .

| QP | Video sequence  | Li <i>et al.</i> [2] |                     | DCAD [6]            |                     | DS-CNN [8]          |                     | MFQE [9]            |                     | MFQE 2.0 [1]        |                     | Ours                |                     |         |
|----|-----------------|----------------------|---------------------|---------------------|---------------------|---------------------|---------------------|---------------------|---------------------|---------------------|---------------------|---------------------|---------------------|---------|
|    |                 | $\Delta\text{PSNR}$  | $\Delta\text{SSIM}$ | $\Delta\text{PSNR}$ | $\Delta\text{SSIM}$ | $\Delta\text{PSNR}$ | $\Delta\text{SSIM}$ | $\Delta\text{PSNR}$ | $\Delta\text{SSIM}$ | $\Delta\text{PSNR}$ | $\Delta\text{SSIM}$ | $\Delta\text{PSNR}$ | $\Delta\text{SSIM}$ |         |
| 32 | A               |                      |                     |                     |                     |                     |                     |                     |                     |                     |                     |                     |                     |         |
|    | Traffic         | 0.318                | 0.0037              | 0.320               | 0.0040              | 0.294               | 0.0040              | 0.536               | 0.0062              | <b>0.599</b>        | <b>0.0067</b>       | -1.033              | -0.032              |         |
|    | PeopleOnStreet  | 0.457                | 0.0045              | 0.461               | 0.0052              | 0.410               | 0.0045              | 0.718               | 0.0082              | <b>0.725</b>        | <b>0.0086</b>       | -0.467              | -0.0100             |         |
|    | Kimono          | 0.269                | 0.0048              | 0.278               | 0.0048              | 0.251               | 0.0048              | <b>0.448</b>        | <b>0.0070</b>       | 0.439               | 0.0070              | -1.270              | -0.0039             |         |
|    | ParkScene       | 0.144                | 0.0028              | 0.201               | 0.0038              | 0.151               | 0.0028              | 0.261               | 0.0050              | <b>0.471</b>        | <b>0.0080</b>       | -1.232              | -0.0291             |         |
|    | B               | Cactus               | 0.210               | 0.0038              | 0.230               | 0.0038              | 0.195               | 0.0038              | 0.378               | 0.0060              | <b>0.424</b>        | <b>0.0061</b>       | -0.534              | -0.0238 |
|    | BQTerrace       | 0.166                | 0.0018              | 0.199               | 0.0028              | 0.174               | 0.0018              | 0.228               | 0.0025              | <b>0.316</b>        | <b>0.0043</b>       | -0.928              | -0.0268             |         |
|    | BasketballDrive | 0.238                | 0.0035              | 0.266               | 0.0038              | 0.228               | 0.0038              | 0.316               | 0.0045              | <b>0.351</b>        | <b>0.0054</b>       | -0.716              | -0.0256             |         |
|    | C               | RaceHorses           | 0.244               | 0.0045              | 0.272               | 0.0048              | 0.236               | 0.0045              | 0.304               | 0.0045              | <b>0.349</b>        | <b>0.0062</b>       | -0.919              | -0.0383 |
|    | BQMall          | 0.299                | 0.0048              | 0.368               | 0.0048              | 0.316               | 0.0048              | 0.491               | 0.0063              | <b>0.578</b>        | <b>0.0072</b>       | -0.893              | -0.0262             |         |
|    | PartyScene      | 0.152                | 0.0030              | 0.160               | 0.0038              | 0.155               | 0.0038              | 0.431               | 0.0075              | <b>0.433</b>        | <b>0.0080</b>       | -0.793              | -0.0326             |         |
|    | BasketballDrill | 0.321                | 0.0038              | 0.410               | 0.0058              | 0.329               | 0.0038              | 0.428               | 0.0053              | <b>0.508</b>        | <b>0.0070</b>       | -1.007              | -0.0291             |         |
|    | RaceHorses      | 0.309                | 0.0048              | 0.351               | 0.0055              | 0.308               | 0.0048              | 0.464               | 0.0070              | <b>0.481</b>        | <b>0.0084</b>       | -0.679              | -0.0320             |         |
|    | D               | BQSquare             | 0.108               | 0.0018              | 0.171               | 0.0014              | 0.154               | 0.0010              | 0.009               | -0.0011             | <b>0.242</b>        | <b>0.0052</b>       | -0.319              | -0.0317 |
|    | BlowingBubbles  | 0.183                | 0.0032              | 0.213               | 0.0038              | 0.130               | 0.0018              | 0.054               | 0.0025              | <b>0.342</b>        | <b>0.0011</b>       | -2.019              | -0.0424             |         |
|    | BasketballPass  | 0.356                | 0.0055              | 0.408               | 0.0065              | 0.367               | 0.0058              | 0.592               | 0.0095              | <b>0.653</b>        | <b>0.0102</b>       | -0.793              | -0.0251             |         |
|    | E               | FourPeople           | 0.405               | 0.0040              | 0.457               | 0.0040              | 0.413               | 0.0040              | 0.632               | 0.0055              | <b>0.741</b>        | <b>0.0060</b>       | -1.206              | -0.0265 |
|    | Johnny          | 0.349                | 0.0031              | 0.389               | 0.0040              | 0.343               | 0.0031              | 0.474               | 0.0038              | <b>0.559</b>        | <b>0.0050</b>       | -1.441              | -0.0315             |         |
|    | KristenAndSara  | 0.406                | 0.0030              | 0.453               | 0.0040              | 0.390               | 0.0031              | 0.568               | 0.0045              | <b>0.698</b>        | <b>0.0050</b>       | -1.823              | -0.0384             |         |
|    | Average         | 0.275                | 0.0037              | 0.316               | 0.0044              | 0.273               | 0.0038              | 0.431               | 0.0058              | <b>0.516</b>        | <b>0.0070</b>       | -1.040              | -0.0303             |         |
| 37 | Average         | 0.299                | 0.0066              | 0.322               | 0.0067              | 0.300               | 0.0063              | 0.455               | 0.0088              | <b>0.562</b>        | <b>0.0109</b>       | -0.651              | -0.0204             |         |

## 5 Performance on other sequences

In addition to the common-used test sequences of JCT-VC, we also test the performance of our and other methods over the test set in [9], which is different from that in the paper. The results are fully shown in Table 4, which still shows the superiority of our MW-GAN according to the perceptual quality enhancement.

Table 3: Overall  $\Delta\text{Ma}$  and  $\Delta\text{NIQE}$  between enhanced and compressed frames on the test set of JCT-VC [5] at QP = 32 and QP = 37.

| QP | Video sequence | Li <i>et al.</i> [2]   |                        | DCAD [6]          |                     | DS-CNN [8]        |                     | MFQE [9]          |                     | MFQE 2.0 [1]      |                     | Ours              |                     |               |               |
|----|----------------|------------------------|------------------------|-------------------|---------------------|-------------------|---------------------|-------------------|---------------------|-------------------|---------------------|-------------------|---------------------|---------------|---------------|
|    |                | $\Delta\text{Ma}$      | $\Delta\text{NIQE}$    | $\Delta\text{Ma}$ | $\Delta\text{NIQE}$ | $\Delta\text{Ma}$ | $\Delta\text{NIQE}$ | $\Delta\text{Ma}$ | $\Delta\text{NIQE}$ | $\Delta\text{Ma}$ | $\Delta\text{NIQE}$ | $\Delta\text{Ma}$ | $\Delta\text{NIQE}$ |               |               |
| 32 | A              |                        |                        |                   |                     |                   |                     |                   |                     |                   |                     |                   |                     |               |               |
|    |                | <i>Traffic</i>         | -0.683                 | 0.319             | -0.611              | 0.228             | -0.536              | 0.211             | -0.604              | 0.277             | -0.574              | 0.287             | <b>1.395</b>        | <b>-0.852</b> |               |
|    |                | <i>PeopleOnStreet</i>  | -0.892                 | 0.838             | -0.697              | 0.639             | -0.643              | 0.684             | -0.697              | 0.917             | -0.765              | 0.823             | <b>0.822</b>        | <b>-0.294</b> |               |
|    |                | <i>Kimono</i>          | -0.373                 | 0.585             | -0.277              | -0.530            | -0.190              | 0.475             | -0.296              | 0.584             | -0.278              | 0.609             | <b>1.823</b>        | <b>-1.299</b> |               |
|    |                | <i>ParkScene</i>       | -0.366                 | 0.506             | -0.327              | 0.434             | -0.235              | 0.458             | -0.310              | 0.507             | -0.336              | 0.489             | <b>0.660</b>        | <b>-0.870</b> |               |
|    |                | <i>Cactus</i>          | -0.099                 | 0.429             | -0.091              | 0.437             | -0.099              | 0.372             | -0.063              | 0.433             | -0.079              | 0.469             | <b>1.096</b>        | <b>-0.810</b> |               |
|    |                | <i>BQTerrace</i>       | -0.305                 | 0.463             | -0.377              | 0.449             | -0.327              | 0.397             | -0.345              | 0.492             | -0.402              | 0.492             | <b>0.377</b>        | <b>-0.274</b> |               |
|    |                | <i>BasketballDrive</i> | -0.243                 | 0.824             | -0.202              | 0.800             | -0.192              | 0.732             | -0.294              | 0.896             | -0.283              | 0.953             | <b>1.254</b>        | <b>-0.588</b> |               |
|    |                | <i>RaceHorses</i>      | -0.310                 | 0.699             | -0.308              | 0.764             | -0.269              | 0.669             | -0.301              | 0.677             | -0.325              | 0.808             | <b>0.398</b>        | <b>-0.761</b> |               |
|    |                | <i>BQMall</i>          | -0.391                 | 0.523             | -0.364              | 0.651             | -0.320              | 0.532             | -0.353              | 0.582             | -0.369              | 0.628             | <b>0.973</b>        | <b>-0.844</b> |               |
|    |                | C                      |                        |                   |                     |                   |                     |                   |                     |                   |                     |                   |                     |               |               |
|    |                |                        | <i>PartyScene</i>      | -0.162            | 0.435               | -0.174            | 0.579               | -0.135            | 0.447               | -0.140            | 0.337               | -0.188            | 0.504               | <b>0.106</b>  | <b>-0.213</b> |
|    |                |                        | <i>BasketballDrill</i> | -0.783            | 0.781               | -0.696            | 1.156               | -0.759            | 0.924               | -0.731            | 0.812               | -0.767            | 1.090               | <b>0.516</b>  | <b>-0.549</b> |
|    |                |                        | <i>RaceHorses</i>      | -0.376            | 0.881               | -0.367            | 0.947               | -0.321            | 0.842               | -0.413            | 0.901               | -0.415            | 0.956               | <b>0.267</b>  | <b>-0.132</b> |
|    |                |                        | <i>BQSquare</i>        | -0.048            | 0.523               | -0.084            | 1.114               | -0.063            | 0.700               | -0.067            | 0.621               | -0.083            | 1.057               | <b>0.068</b>  | <b>-0.981</b> |
|    |                |                        | <i>BlowingBubbles</i>  | -0.143            | 0.841               | -0.166            | 1.004               | -0.133            | 0.783               | -0.143            | 0.645               | -0.164            | 0.780               | <b>0.168</b>  | <b>-0.315</b> |
|    |                |                        | <i>BasketballPass</i>  | -0.410            | 0.664               | -0.385            | 0.743               | -0.360            | 0.675               | -0.485            | 0.662               | -0.493            | 0.695               | <b>0.697</b>  | <b>-0.890</b> |
|    |                | <i>FourPeople</i>      | -0.088                 | 0.443             | -0.028              | 0.434             | -0.038              | 0.429             | -0.039              | 0.438             | -0.015              | 0.424             | <b>1.468</b>        | <b>-0.790</b> |               |
|    |                | <i>Johnny</i>          | -0.440                 | 0.176             | -0.415              | 0.264             | -0.133              | 0.297             | -0.409              | 0.318             | -0.262              | 0.256             | <b>1.462</b>        | <b>-0.881</b> |               |
|    |                | <i>KristenAndSara</i>  | -0.042                 | 0.515             | 0.030               | 0.661             | -0.080              | 0.641             | -0.025              | 0.650             | 0.040               | 0.745             | <b>1.582</b>        | <b>-1.027</b> |               |
|    |                | Average                | -0.342                 | 0.580             | -0.308              | 0.657             | -0.269              | 0.570             | -0.318              | 0.597             | -0.320              | 0.670             | <b>0.841</b>        | <b>-0.687</b> |               |
| 37 | Average        | -0.300                 | 0.782                  | -0.324            | 0.917               | -0.286            | 0.838               | -0.363            | 0.872               | -0.314            | 0.913               | <b>1.145</b>      | <b>-0.842</b>       |               |               |

Table 4: Overall  $\Delta\text{LPIPS}$  and  $\Delta\text{PI}$  between enhanced and compressed frames on the test set of MFQE [9] at QP = 32.

| QP | Video sequence | Li <i>et al.</i> [2]  |                   | DCAD [6]             |                   | DS-CNN [8]           |                   | MFQE [9]             |                   | MFQE 2.0 [1]         |                   | Ours                 |                   |               |
|----|----------------|-----------------------|-------------------|----------------------|-------------------|----------------------|-------------------|----------------------|-------------------|----------------------|-------------------|----------------------|-------------------|---------------|
|    |                | $\Delta\text{LPIPS}$  | $\Delta\text{PI}$ | $\Delta\text{LPIPS}$ | $\Delta\text{PI}$ | $\Delta\text{LPIPS}$ | $\Delta\text{PI}$ | $\Delta\text{LPIPS}$ | $\Delta\text{PI}$ | $\Delta\text{LPIPS}$ | $\Delta\text{PI}$ | $\Delta\text{LPIPS}$ | $\Delta\text{PI}$ |               |
| 32 |                | <i>PeopleOnStreet</i> | 0.020             | 0.865                | 0.020             | 0.668                | 0.019             | 0.663                | 0.017             | 0.807                | 0.017             | 0.794                | <b>-0.020</b>     | <b>-0.558</b> |
|    |                | <i>TunnelFlag</i>     | 0.013             | 0.151                | 0.013             | 0.120                | 0.013             | 0.200                | 0.013             | 0.103                | 0.013             | 0.082                | <b>-0.029</b>     | <b>-0.832</b> |
|    |                | <i>Kimono</i>         | 0.038             | 0.479                | 0.034             | 0.403                | 0.033             | 0.332                | 0.034             | 0.440                | 0.036             | 0.443                | <b>-0.069</b>     | <b>-1.561</b> |
|    |                | <i>BarScene</i>       | 0.021             | 0.309                | 0.018             | 0.342                | 0.020             | 0.346                | 0.020             | 0.280                | 0.018             | 0.284                | <b>-0.064</b>     | <b>-2.024</b> |
|    |                | <i>Vidyo1</i>         | 0.017             | 0.599                | 0.013             | 0.513                | 0.017             | 0.441                | 0.014             | 0.460                | 0.012             | 0.443                | <b>-0.024</b>     | <b>-1.339</b> |
|    |                | <i>Vidyo3</i>         | 0.007             | 0.376                | 0.004             | 0.384                | 0.006             | 0.421                | 0.004             | 0.393                | 0.003             | 0.343                | <b>-0.038</b>     | <b>-0.877</b> |
|    |                | <i>Vidyo4</i>         | 0.024             | 0.271                | 0.021             | 0.282                | 0.023             | 0.352                | 0.021             | 0.330                | 0.020             | 0.243                | <b>-0.035</b>     | <b>-1.531</b> |
|    |                | <i>BasketballPass</i> | 0.020             | 0.537                | 0.016             | 0.564                | 0.016             | 0.517                | 0.020             | 0.574                | 0.019             | 0.594                | <b>-0.021</b>     | <b>-0.794</b> |
|    |                | <i>RaceHorses</i>     | 0.023             | 0.504                | 0.022             | 0.536                | 0.021             | 0.469                | 0.025             | 0.489                | 0.027             | 0.566                | <b>-0.021</b>     | <b>-0.579</b> |
|    |                | <i>MaD</i>            | 0.013             | 0.436                | 0.012             | 0.374                | 0.011             | 0.272                | 0.010             | 0.313                | 0.009             | 0.300                | <b>-0.074</b>     | <b>-0.483</b> |
|    |                | Average               | 0.020             | 0.453                | 0.017             | 0.419                | 0.018             | 0.401                | 0.018             | 0.419                | 0.017             | 0.409                | <b>-0.039</b>     | <b>-1.058</b> |

## References

1. Guan, Z., Xing, Q., Xu, M., Yang, R., Liu, T., Wang, Z.: Mfqe 2.0: A new approach for multi-frame quality enhancement on compressed video. *IEEE Transactions on Pattern Analysis and Machine Intelligence (TPAMI)* pp. 1–1 (2019)
2. Li, K., Bare, B., Yan, B.: An efficient deep convolutional neural networks model for compressed image deblocking. In: 2017 IEEE International Conference on Multimedia and Expo (ICME). pp. 1320–1325. IEEE (2017)
3. Ma, C., Yang, C.Y., Yang, X., Yang, M.H.: Learning a no-reference quality metric for single-image super-resolution. *Computer Vision and Image Understanding (CVIU)* **158**, 1–16 (2017)
4. Mittal, A., Soundararajan, R., Bovik, A.C.: Making a completely blind image quality analyzer. *IEEE Signal Processing Letters* **20**(3), 209–212 (2012)
5. Ohm, J.R., Sullivan, G.J., Schwarz, H., Tan, T.K., Wiegand, T.: Comparison of the coding efficiency of video coding standards including high efficiency video coding (hevc). *IEEE Transactions on circuits and systems for video technology (TCSVT)* **22**(12), 1669–1684 (2012)
6. Wang, T., Chen, M., Chao, H.: A novel deep learning-based method of improving coding efficiency from the decoder-end for hevc. In: 2017 Data Compression Conference (DCC). pp. 410–419. IEEE (2017)
7. Wang, Z., Bovik, A.C., Sheikh, H.R., Simoncelli, E.P., et al.: Image quality assessment: from error visibility to structural similarity. *IEEE Transactions on Image Processing (TIP)* **13**(4), 600–612 (2004)
8. Yang, R., Xu, M., Wang, Z.: Decoder-side hevc quality enhancement with scalable convolutional neural network. In: 2017 IEEE International Conference on Multimedia and Expo (ICME). pp. 817–822. IEEE (2017)
9. Yang, R., Xu, M., Wang, Z., Li, T.: Multi-frame quality enhancement for compressed video. In: Proceedings of the IEEE Conference on Computer Vision and Pattern Recognition (CVPR). pp. 6664–6673 (2018)
